# Supplementary material for: Facile synthesis of mesoporous melamine-formaldehyde spheres for carbon dioxide capture
Source: Royal Society of Chemistry journal article supplement (doi:10.1039/c6ra09508a), 2016-01-01
Supplement: c6ra09508a1.pdf [file c6ra09508a1.pdf]

# Facile Synthesis of Mesoporous Melamine-Formaldehyde Spheres for Carbon Dioxide Capture

Zhongfei Lv,<sup>[a]</sup> Dandan Zhao,<sup>[b]</sup> and Shiai Xu\*<sup>[a]</sup>

<sup>a</sup> Shanghai Key Laboratory of Advanced Polymeric Materials, Key Laboratory for Ultrafine Materials of Ministry of Education, School of Materials Science and Engineering, East China University of Science and Technology, Shanghai 200237, China

<sup>b</sup> Chemical Experiment Center, School of Chemistry and Molecular Engineering, East China University of Science and Technology, Shanghai 2002237, China

Corresponding author. Fax. (+86) 021-6425-3775

Tel.: (+86) 021-64253353

E-mail addresses: [saxu@ecust.edu.cn](mailto:saxu@ecust.edu.cn), [saxu@163.com](mailto:saxu@163.com)

## Supplementary Tables

**Table S1** Physical and gas adsorption properties of MMFSs.<sup>a</sup>

| Sample   | PFA/M | BET<br>area (m <sup>2</sup> g <sup>-1</sup> ) <sup>1)</sup> | BJH<br>pore size<br>(nm) | Pore<br>volume<br>(cm <sup>3</sup> g <sup>-1</sup> ) | CO <sub>2</sub><br>Uptake<br>(mg g <sup>-1</sup> ) <sup>b</sup> | CO <sub>2</sub><br>Uptake<br>(mg g <sup>-1</sup> ) <sup>c</sup> | N <sub>2</sub><br>Uptake<br>(mg g <sup>-1</sup> ) <sup>d</sup> |
|----------|-------|-------------------------------------------------------------|--------------------------|------------------------------------------------------|-----------------------------------------------------------------|-----------------------------------------------------------------|----------------------------------------------------------------|
| MMFS-2.0 | 2.0   | 109                                                         | 4.4                      | 0.21                                                 | 42.2                                                            | ----                                                            | ----                                                           |
| MMFS-2.5 | 2.5   | 100                                                         | 5.6                      | 0.19                                                 | 39.1                                                            | ----                                                            | ----                                                           |
| MMFS-3.0 | 3.0   | 298                                                         | 3.0                      | 0.46                                                 | 48.0                                                            | 28.1                                                            | 1.1                                                            |
| MMFS-3.5 | 3.5   | 106                                                         | 3.2                      | 0.20                                                 | 33.4                                                            | ----                                                            | ----                                                           |
| MMFS-4.0 | 4.0   | 63                                                          | ----                     | 0.11                                                 | 32.5                                                            | ----                                                            | ----                                                           |
| MMFS-4.5 | 4.5   | 63                                                          | ----                     | 0.10                                                 | 30.2                                                            | ----                                                            | ----                                                           |

<sup>a</sup>MMFSs with PFA/M molar ratio between 2.0 to 4.5 were synthesized by a facile route as described in Figure 1 and Chemical Section. <sup>b</sup>CO<sub>2</sub> adsorption measured at 273K. <sup>c</sup>CO<sub>2</sub> adsorption measured at 298K. <sup>d</sup>N<sub>2</sub> adsorption measured at 298K.

**Table S2** Structural characteristics of MMFS-2.5, MMFS-3.0 and MMFS-3.5 from the solid-state  $^{13}\text{C}$  NMR spectroscopy.<sup>a</sup>

| Sample   | C <sub>1,2</sub> (%) | C <sub>3</sub> (%) | C <sub>4</sub> (%) |
|----------|----------------------|--------------------|--------------------|
| MMFS-2.5 | 60.13                | 26.24              | 13.63              |
| MMFS-3.0 | 59.52                | 26.15              | 14.33              |
| MMFS-3.5 | 57.81                | 26.53              | 15.66              |

<sup>a</sup>MMFSs with PFA/M molar ratio between 2.5 to 3.5 were synthesized by a facile route as described in Figure 1 and Chemical Section.

**Table S3** Element analysis of MMFSs with different PFA/M molar ratios.<sup>a</sup>

| Element  | C     | N     | H    | O     |
|----------|-------|-------|------|-------|
| MMFS-2.0 | 31.22 | 42.94 | 4.35 | 21.49 |
| MMFS-2.5 | 33.91 | 45.88 | 4.24 | 15.97 |
| MMFS-3.0 | 33.81 | 45.59 | 4.24 | 16.36 |
| MMFS-3.5 | 32.52 | 43.23 | 4.45 | 19.80 |
| MMFS-4.0 | 34.26 | 42.68 | 4.34 | 18.72 |
| MMFS-4.5 | 33.32 | 42.91 | 4.52 | 19.25 |

<sup>a</sup>MMFSs with PFA/M molar ratio between 2.0 to 4.5 were synthesized through a facile route as described in Figure 1 and Chemical Section.

**Table S4** Element analysis of MMFSs with different PFA/M molar ratios.<sup>a</sup>

| Element<br>Molar ratio | C | N    | H    | O    |
|------------------------|---|------|------|------|
| MMFS-2.0               | 1 | 1.18 | 1.67 | 0.52 |
| MMFS-2.5               | 1 | 1.16 | 1.50 | 0.35 |
| MMFS-3.0               | 1 | 1.16 | 1.50 | 0.36 |
| MMFS-3.5               | 1 | 1.14 | 1.64 | 0.46 |
| MMFS-4.0               | 1 | 1.07 | 1.52 | 0.41 |
| MMFS-4.5               | 1 | 1.10 | 1.63 | 0.43 |

<sup>a</sup>MMFSs with PFA/M molar ratio between 2.0 to 4.5 were synthesized through a facile route as described in Figure 1 and Chemical Section.

## Figure captions.

**Figure S1.** N<sub>2</sub> adsorption/desorption isotherms of MMFS-2.0 (A), MMFS-2.5 (B), MMFS-3.5 (C), MMFS-4.0 (D) and MMFS-4.5 (E); pore size distributions of MMFS-2.0 (a), MMFS-2.5 (b) and MMFS-3.5 (c).

**Figure S2.** SEM images of MMFS-2.0 (A), MMFS-2.5 (B), MMFS-3.0 (C), MMFS-3.5 (D), MMFS-4.0 (E) and MMFS-4.5 (F).

**Figure S3.** TGA curves of MMFS-3.0.

**Figure S4.** O<sub>2</sub> adsorption isotherm of MMFS-3.0 at 1 bar and 298 K.

**Figure S5.** CO<sub>2</sub> adsorption isotherms of MMFS-4.5 at the first time (A), second time (B), third time (C) and fourth time (D) at 273 K and 1 bar.

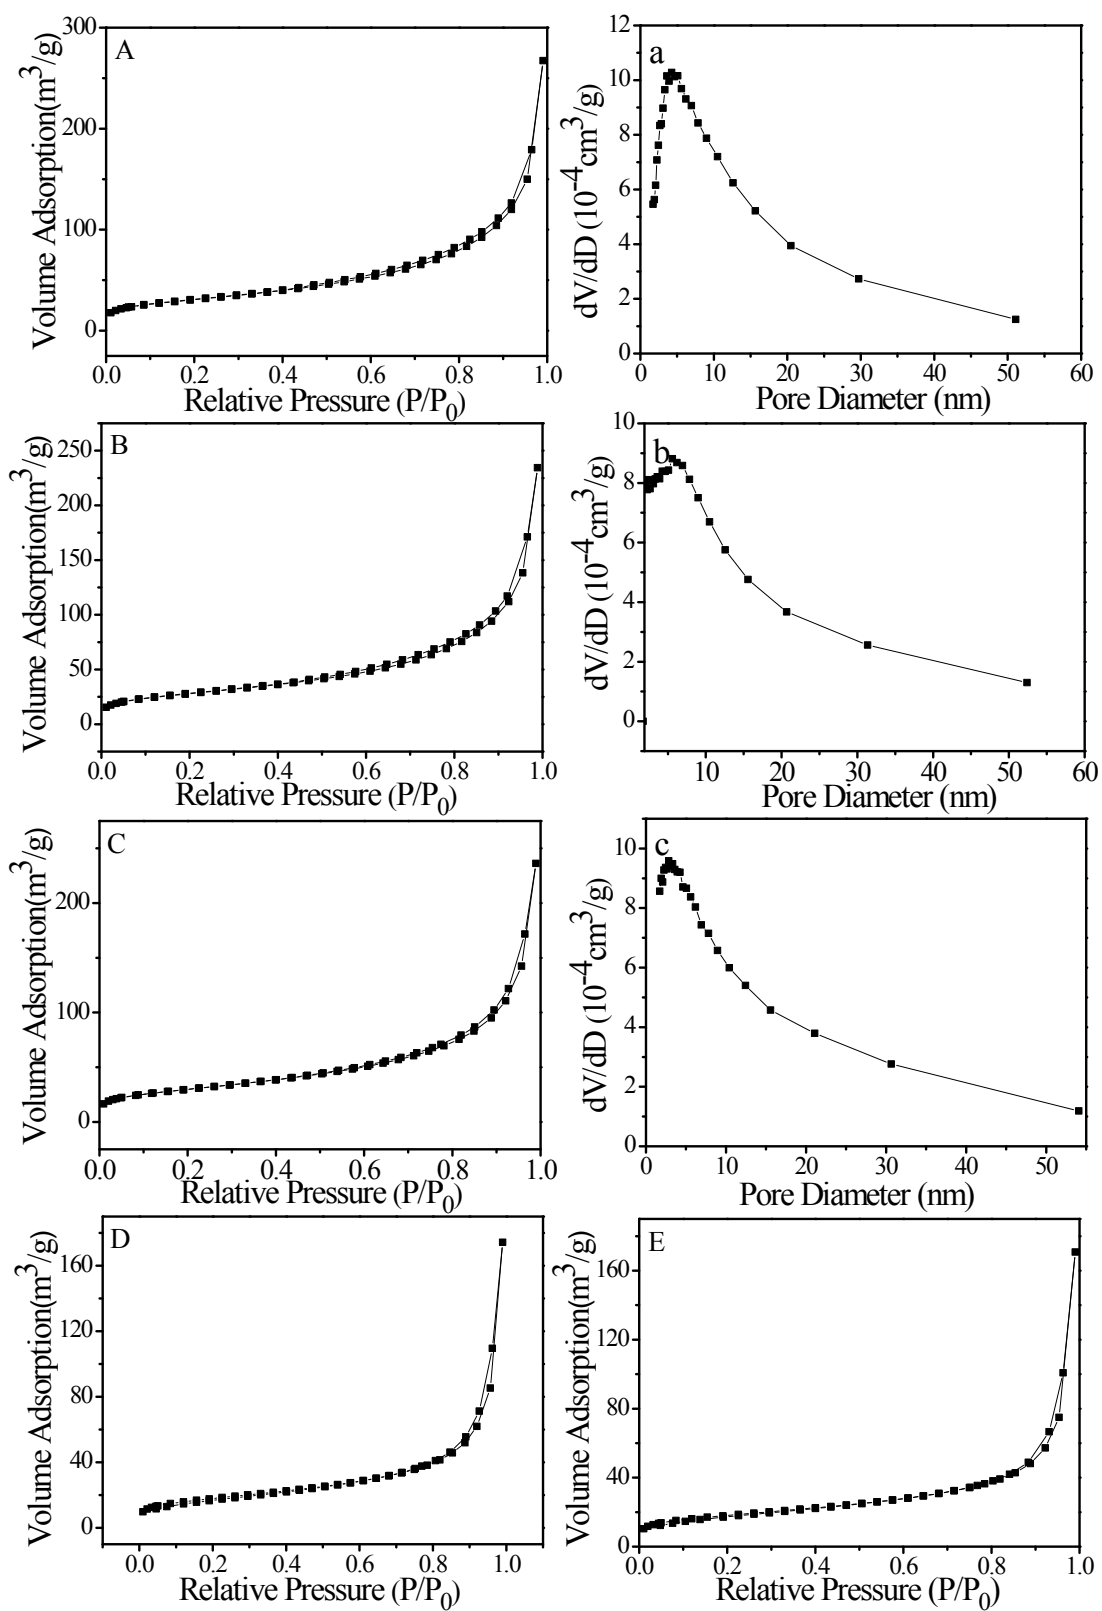

**Figure S1**

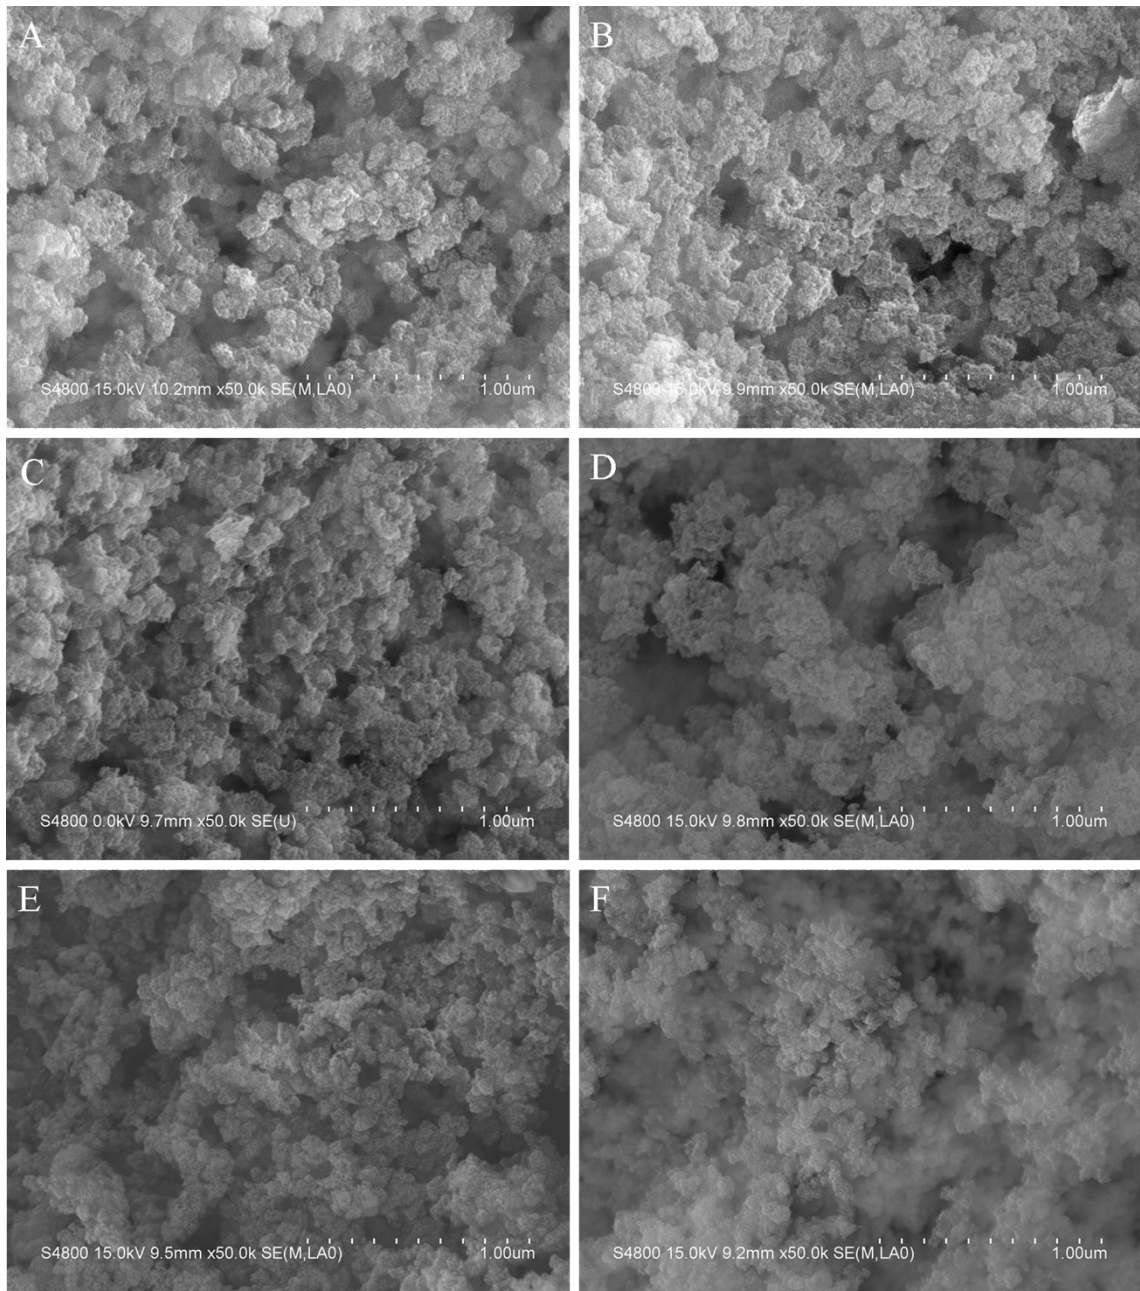

**Figure S2**



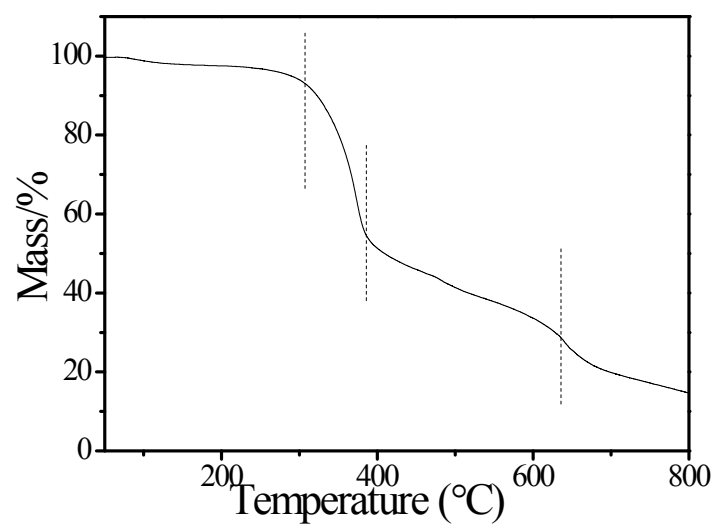

*Figure S3*

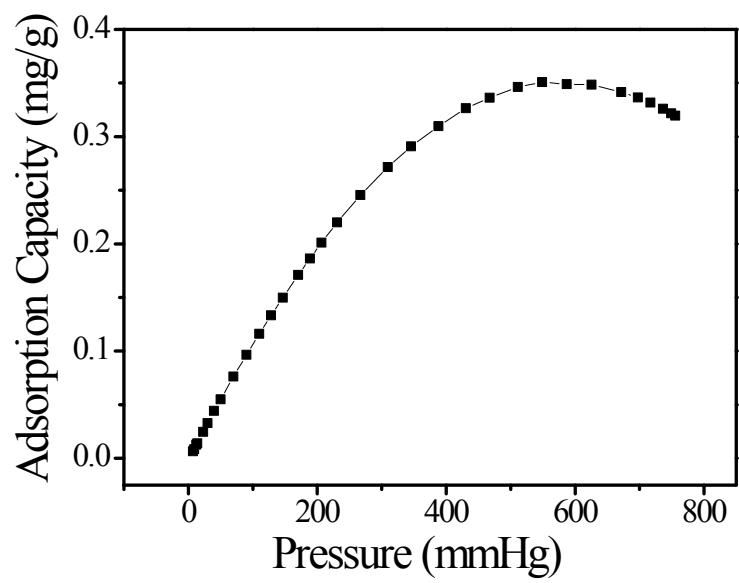

*Figure S4*

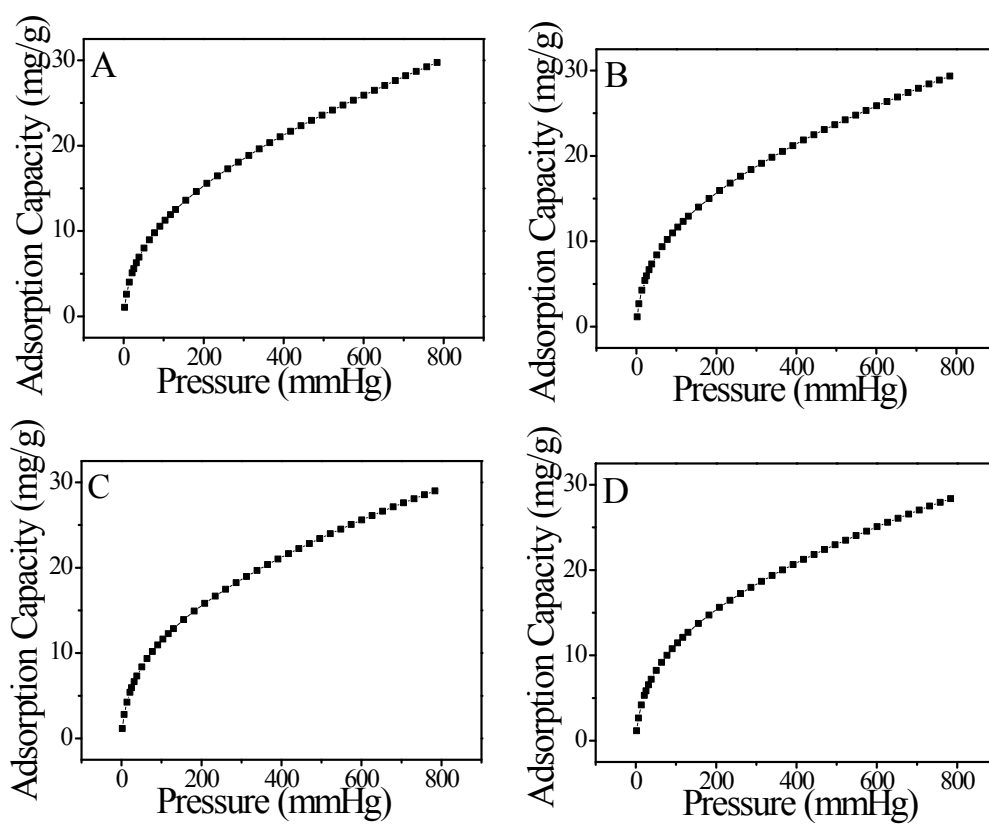

*Figure S5*
